# Supplementary material for: Clinical responses with T lymphocytes targeting malignancy-associated κ light chains
Source: JCI journal article supplement (doi:10.1172/jci86000), 2016-06-05
Supplement: sd1 [file 1]

**Supplemental Table 1. Characteristics of the generated  $\kappa$ .CART lines**

|                                                                                       | <b>IL-2<br/>(N = 13)</b>    | <b>IL-7 and IL-15<br/>(N = 11)</b> |
|---------------------------------------------------------------------------------------|-----------------------------|------------------------------------|
| <b>Days in culture</b>                                                                | 18 $\pm$ 4                  | 15 $\pm$ 2                         |
| <b>Cell numbers at time of clinical freeze</b>                                        | 7.3 $\pm$ 3.4 $\times 10^8$ | 13 $\pm$ 1.0 $\times 10^8$         |
| <b>Transduction (% CAR<sup>+</sup> cells)</b>                                         | 82 $\pm$ 12                 | 89 $\pm$ 6                         |
| <b>CD3<sup>+</sup> CD8<sup>+</sup> cells (%)</b>                                      | 78 $\pm$ 11                 | 56 $\pm$ 12                        |
| <b>CD3<sup>+</sup> CD45RO<sup>+</sup> cells (%)</b>                                   | 94.5 $\pm$ 4.5              | 91 $\pm$ 6                         |
| <b>CD3<sup>+</sup> CD127<sup>+</sup> (%)</b>                                          | 8.1 $\pm$ 5.6               | 6.5 $\pm$ 5                        |
| <b>CD8<sup>+</sup> CD45RO<sup>+</sup> CD62L<sup>+</sup> (%)</b>                       | 17.1 $\pm$ 9.7              | 14.2 $\pm$ 7.2                     |
| <b>CD8<sup>+</sup> CD45RA<sup>+</sup> CCR7<sup>+</sup> cells (%)</b>                  | 4.9 $\pm$ 4.1               | 10.7 $\pm$ 7.1                     |
| <b>CD8<sup>+</sup> CD45RA<sup>+</sup> CD28<sup>+</sup> CD27<sup>+</sup> cells (%)</b> | 3.2 $\pm$ 2.3               | 5.1 $\pm$ 4.2                      |
| <b>CD3<sup>-</sup> CD56<sup>+</sup> (%)</b>                                           | 0.4 $\pm$ 0.6               | 0.5 $\pm$ 0.4                      |

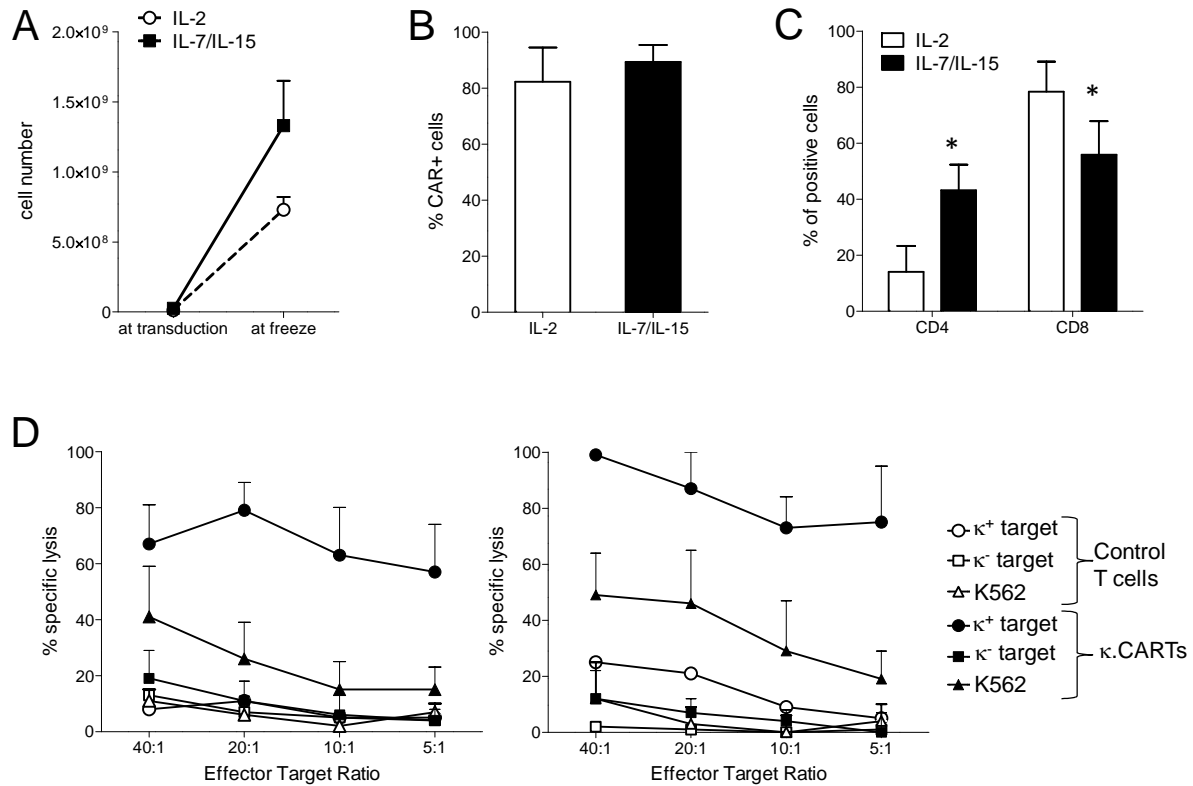

**Supplemental Figure 1. Comparison of  $\kappa$ .CARTs expanded in IL-2 or IL-7/IL-15.** Panel A shows the total cells number at the time of transduction and clinical freeze between  $\kappa$ .CARTs grown in IL-2 (open circle) or in IL-7/IL-15 (closed square). Panel B shows the percentage of CAR-expressing T cells upon removal from retronectin-coated plates, grown in IL-2 (white bar) or in IL-7/IL-15 (black bars). Panel C shows the percentage of T cells expressing CD4 or CD8 when grown in IL-2 (white bar) or in IL-7/IL-15 (black bars), at the time of clinical freeze. Panel D shows the cytotoxic activity of  $\kappa$ .CARTs (closed symbols) or control, non-transduced T cells (open symbols) expanded in IL-2 (left graph) or in IL-7/IL-15 (right graph). Targets were  $\kappa^+$  tumor cells (Daudi, circle),  $\kappa^-$  tumor cells (HDLM-2, square) or an NK-sensitive cell line (K562, triangle). Data are shown as mean  $\pm$  SD (\* $p < 0.05$ , unpaired  $t$  test).

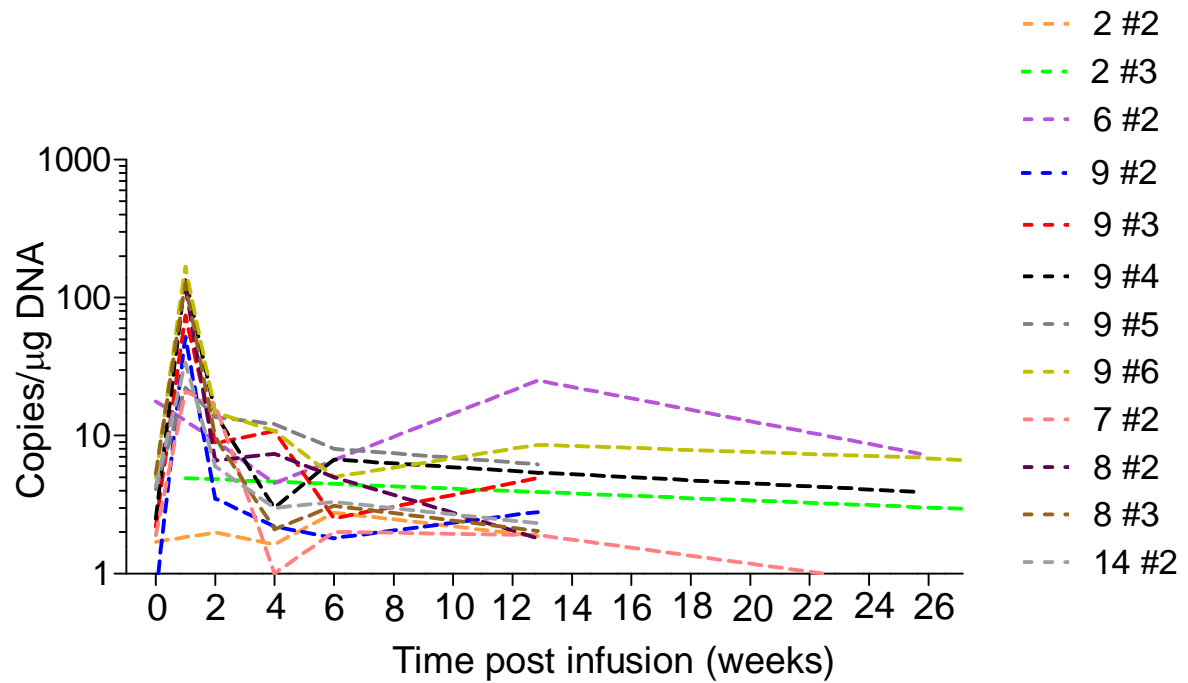

**Supplemental Figure 2. In vivo expansion and persistence of infused  $\kappa$ .CARTs after subsequent infusions as assessed by Q-PCR in peripheral blood.** Data points represent critical post-infusion intervals after the first infusion of  $\kappa$ .CARTs. There was no significant difference in the area under the curve (AUC) for additional infusions in the same patient (Wilcoxon signed-rank test). Dotted lines denote each patient (legend shows universal patient identifier numbers, UPINs) and infusion number.

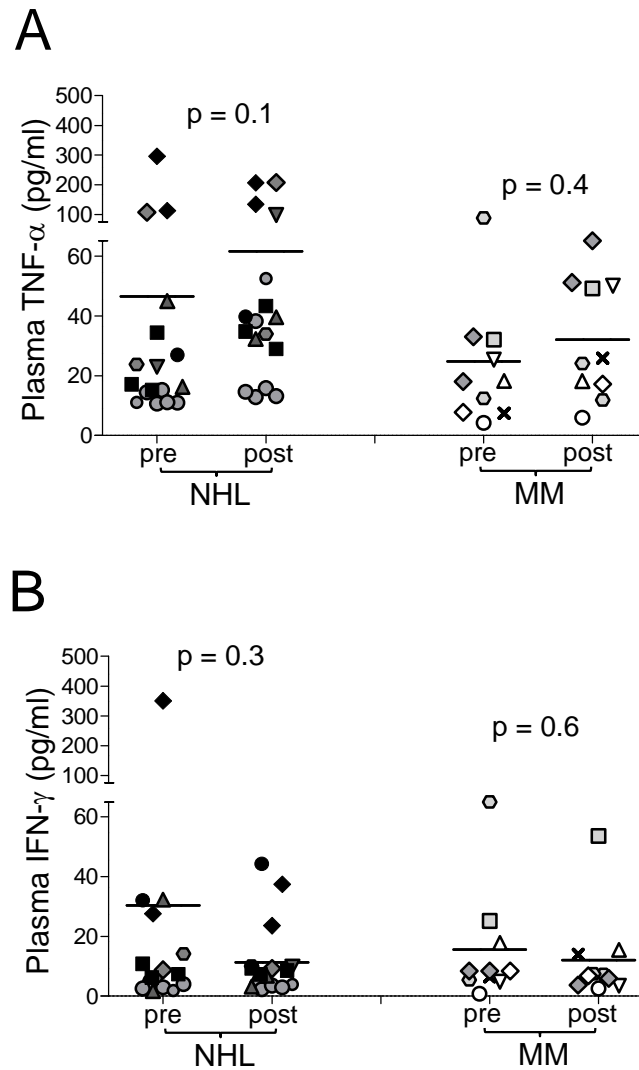

**Supplemental Figure 3. Cytokine levels in PB pre and post  $\kappa$ .CART infusion.** Plasma levels of TNF $\alpha$  (A) and IFN $\gamma$  (B) before and after  $\kappa$ .CART infusion in NHL (N=17 infusions) and MM (N=10 infusions) patients (paired  $t$  test). No clinical evidence of cytokine release syndrome was seen. Each symbol denotes one infusion.

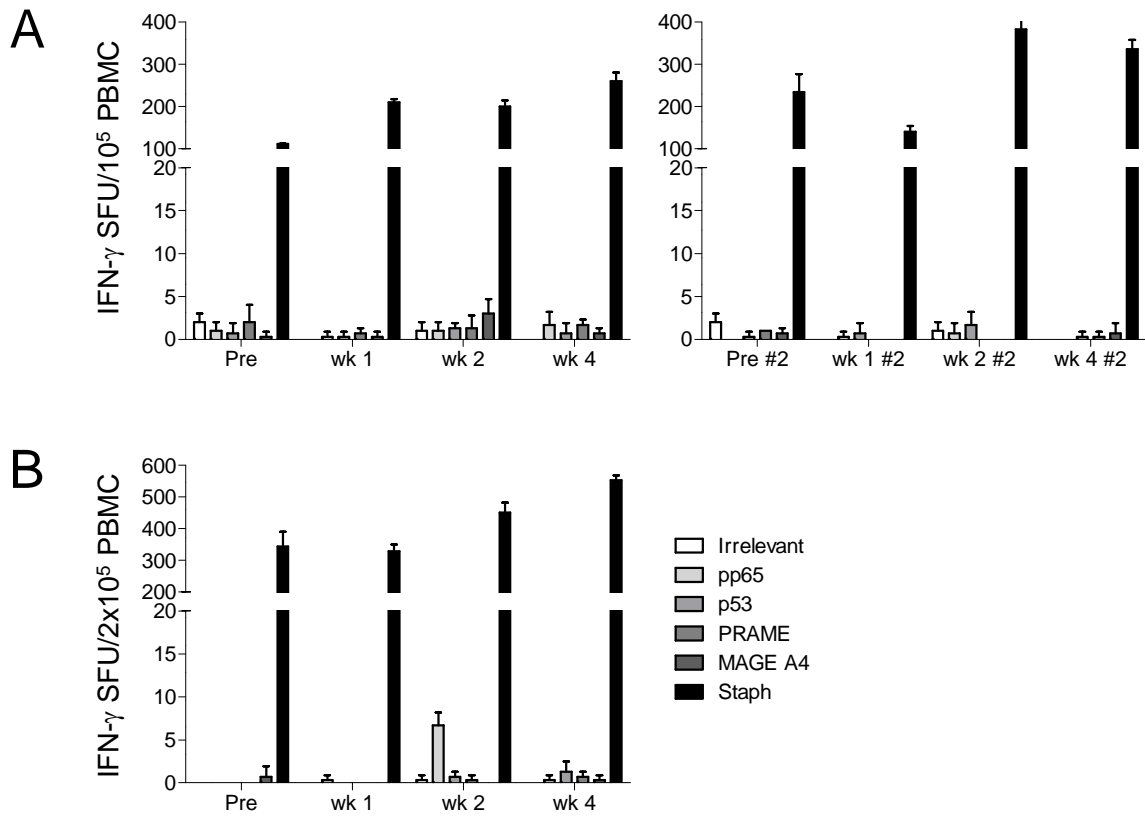

**Supplemental Figure 4. Frequency of T-cell precursors in peripheral blood responding to viral and tumor-associated antigens.** The graphs show results of IFN $\gamma$  ELISpot assays using PBMCs and targeting the indicated pepmixes, at different time points before and after  $\kappa$ .CART infusion for UPIN #9 (A) and UPIN #14 (B) (SFU: Spot Forming Unit).
